- plastics: A comparison of nylon, orlon, dacron, teflon and marlex. *Arch Surg* 76:997, 1958
5. Brewer JH, Bryant HH: The toxicity and safety testing of disposable medical and pharmaceutical materials. *J Amer Pharm Ass Sci Ed* 49:652, 1960
  6. Nimmi M: Sensitive biological tests for medical grade plastics. 1. Toxicity of organotin stabilizers. *J Pharm Sci* 53:1263, 1964
  7. Guess WL, Autian J: Biological testing of plastics to be used in medical practice. *Amer J Hosp Pharm* 21:260-267, 1964
  8. Schildknecht CE: *Vinyl and Related Polymers*. New York, John Wiley and Sons, Inc., 1952
  9. Legaux R: *Practical Toxicology of Plastics*. Cleveland, Ohio, The Chemical Rubber Co., 1968
  10. Cruickshank CN, Hooper C, Lewis HB, *et al.*: The toxicity of rubbers and plastics used in transfusion sets. *J Clin Path* 13:42, 1960
  11. Lawrence WH, Mitchell JL, Guess WL, *et al.*: Toxicity of plastics used in medical practice. I: Investigation of tissue response in animals by certain unit packaged polyvinyl chloride administration devices. *J Pharm Sci* 52:958-963, 1963
  12. Meyers DB, Autian J, Guess WL: *Ibid.* II: Toxicity of citric acid esters used as plasticizers. *J Pharm Sci* 53:774-777, 1964
  13. Guess WL, Autian J: A note on the response of an extract from a medically used polyvinyl chloride tubing. *Acta Pharm Suec* 2: 273-278, 1965
  14. Calley D, Autian J, Guess WL: Toxicology of a series of phthalate esters. *J Pharm Sci* 55:158-162, 1966
  15. Calley DJ, Guess WL, Autian J: Hepatotoxicity of a series of organotin esters. *J Pharm Sci* 56:240-243, 1967

#### SELECTED READINGS ON PLASTICS

1. *Materials in Biomedical Engineering*. Edited by Levine NS. *Ann NY Acad Sci* 146, 1968
2. Couzens EG, Yarsley VE: *Plastics in the Modern World*. Baltimore, Penguin Books, 1968
3. Autian J: Plastics in pharmaceutical practice and related fields. *J Pharm Sci* 52:1-23, 1963
4. Atlas SM, Mark HF: *Plastics in Surgical Implants*. American Society for Testing and Materials, Publication 386. Philadelphia, 1965
5. Kressor TOJ: *Polyethylene*. New York, Reinhold Publishing Corp., 1961

### Pediatrics

**PHLEBITIS IN INFANTS** Infusion phlebitis occurs commonly in infants and children. The high incidence of phlebitis in infants with cutdowns appears to be the result of complete blocking of small peripheral veins, which prevents the dilution and buffering of the infusate by blood. Generally, peripheral cutdowns should be used only when needle puncture is not feasible. Glucose infusion solutions may cause chemical irritation of the endothelium, which is then followed by inflammation and thrombosis. Buffering of glucose infusions with sodium bicarbonate immediately prior to administration may reduce the incidence of phlebitis. (Faulksrud, A. W.: *Postinfusion Phlebitis in Infants and Children; How to Avoid this Complication*, *Clin. Pediat.* 8: 135 (March) 1969.)

**ANXIETY IN CHILDREN** In a study of 144 pediatric patients ranging in age from one to eight years, the presence of parents immediately prior to elective surgery had no measurable beneficial effect on the emotional state of the children prior to induction of anesthesia. Children between one and five years of age exhibited more anxiety than children between five and eight years of age. (Lee, J. S., and Greene, N.: *Parental Presence and Emotional State of Children Prior to Surgery*, *Clin. Pediat.* 8: 126 (March) 1969.) **ABSTRACTER'S COMMENT:** "Rooming in" should not be eliminated because of the evidence in this paper. The crucial question to be answered remains the effect of "rooming in" (plus all other techniques designed to alleviate anxiety) on the posthospitalization behavior of the child. Conclusions based on an evaluation of the emotional state of a child at a single point in time may be misleading.
